# Supplementary material
Source: publisher figshare collection journal article supplement (https://gsajournals.figshare.com/ndownloader/files/22294932)
Supplement: Supplementary file 1 [file 22294932]

**Description of txt tables (Japanese quail, Vollmar et al.)**

**Phenotype_Japanese_quail_Vollmar**

- Column Animal_ID contains the individual ID of each animal
- Body_weight_gain contains the measurements of the difference between the life weights at day 10 and day 15 of each individual in g
- Feed_intake contains the measurements of feed intake during the experimental period of each individual in g
- Feed_per_gain_ratio describes the feed intake divided by body weight gain in g/g
- P_utilization contains the measurements of the difference between absorbed and excreted quantity of phosphorus of each individual in %
- Ca_utilization contains the measurements of the difference between absorbed and excreted quantity of phosphorus of each individual in %
- Test_day contains the 12 different test-days

**Phylum_Japanese_quail_Vollmar**

- Column Phylum_ID contains individual phyla (sorted alphabetically)
- First row contains Animal_IDs (1001, 1002,…)
- Values are abundances of phylum e.g. in one column all phyla for one animal

**Genus_Japanese_quail_Vollmar**

- Column Genus_ID contains individual genera (sorted alphabetically)
- First row contains Animal_IDs (1001, 1002,…)
- Values are abundances of genera e.g. in one column all genera for one animal

**OTU_Japanese_quail_Vollmar**

- Column OTU_ID contains individual OTUs (sorted alphabetically)
- First row contains Animal_IDs (1001, 1002,…)
- Values are abundances of OTUs e.g. in one column all OTUs for one animal
